# Supplementary material for: Incidence rate of injury and injury sites in European and Swiss karate competitions: a prospective epidemiological study of 2404 fights
Source: HighWire-hosted journal article supplement (doi:10.1136/bmjsem-2023-001719), 2023-09-01
Supplement: bmjsem-2023-001719supp001_data_supplement.pdf [file bmjsem-2023-001719supp001_data_supplement.pdf]

## **Annex 01; Injury severity classification**

### **Grade III - Minor injuries**

Grade I concussion (the athlete is briefly stunned and confused, regaining full faculty within a few minutes)

Contusion of solar plexus

Epistaxis without a fracture

All other injuries not listed above, and generally not requiring removal from the match or further medical care

### **Grade II - Moderate injuries**

Grade II concussions (involving retrograde and/or antegrade memory loss)

Clavicular, nasal, digital, metacarpal and metatarsal fractures, but not involving a joint surface or requiring open reduction or internal fixation

Dental injury with tooth loss or requiring restorative procedures

Corneal abrasions acutely affecting vision

Laceration requiring stitches

Joint dislocation that self-reduces at the ring

Contusion, sprain or hematoma preventing use of the limb on the day of competition

### **Grade I – Severe injuries**

Grade III concussions (involving loss of consciousness)

Fractures excluding clavicular, nasal, digital, metacarpal and metatarsal fractures; but including any fracture involving a joint surface or requiring open reduction or internal fixation

Third degree sprains, or any joint injury likely requiring surgery or expected to result in permanent disabling sequelae

Dislocated joint requiring manipulative reduction

Damage to viscera (pneumothorax, acute abdomen)

Major facial laceration with cosmetic or functional sequelae

Facial bone fracture excluding nasal fractures

Eye injury likely to cause residual visual loss (globe laceration, hyphema, retinal detachment)  
or injuries causing damage to lid function or lacrimal apparatus

Any injury requiring hospitalization or surgery, or expected to result in significant functional or  
cosmetic sequelae
